# Supplementary material for: Internal electric field promoted charge separation via bismuth-based ternary heterojunctions with near-infrared light harvesting properties for efficient photoredox reactions
Source: Royal Society of Chemistry journal article supplement (doi:10.1039/d4ta02523g), 2024-01-01
Supplement: d4ta02523g1.pdf [file d4ta02523g1.pdf]

# **Internal electric field promoted charge separation via bismuth-based ternary heterojunctions with near-infrared light harvesting properties for efficient photoredox reactions**

Rama Krishna Chava,<sup>\*a</sup> Younghwan Im<sup>b</sup> and Misook Kang<sup>a\*</sup>

<sup>a</sup>Department of Chemistry, College of Natural Sciences, Yeungnam University, 280 Daehak-Ro, Gyeongsan, Gyeongbuk 38541, Republic of Korea

<sup>b</sup>Korea Research Institute of Chemical Technology (KRICT), 141 Gajeong-ro, Yuseong-gu, Daejeon 34114, Republic of Korea

## Corresponding Authors Address:

Dr. Rama Krishna Chava (Email: [drcrkphysics@hotmail.com](mailto:drcrkphysics@hotmail.com), [rama@ynu.ac.kr](mailto:rama@ynu.ac.kr))

Prof. Misook Kang (Email: [mskang@ynu.ac.kr](mailto:mskang@ynu.ac.kr))

Department of Chemistry, College of Natural Sciences, Yeungnam University, 280 Daehak-Ro, Gyeongsan-38541, Gyeongbuk, Republic of Korea.

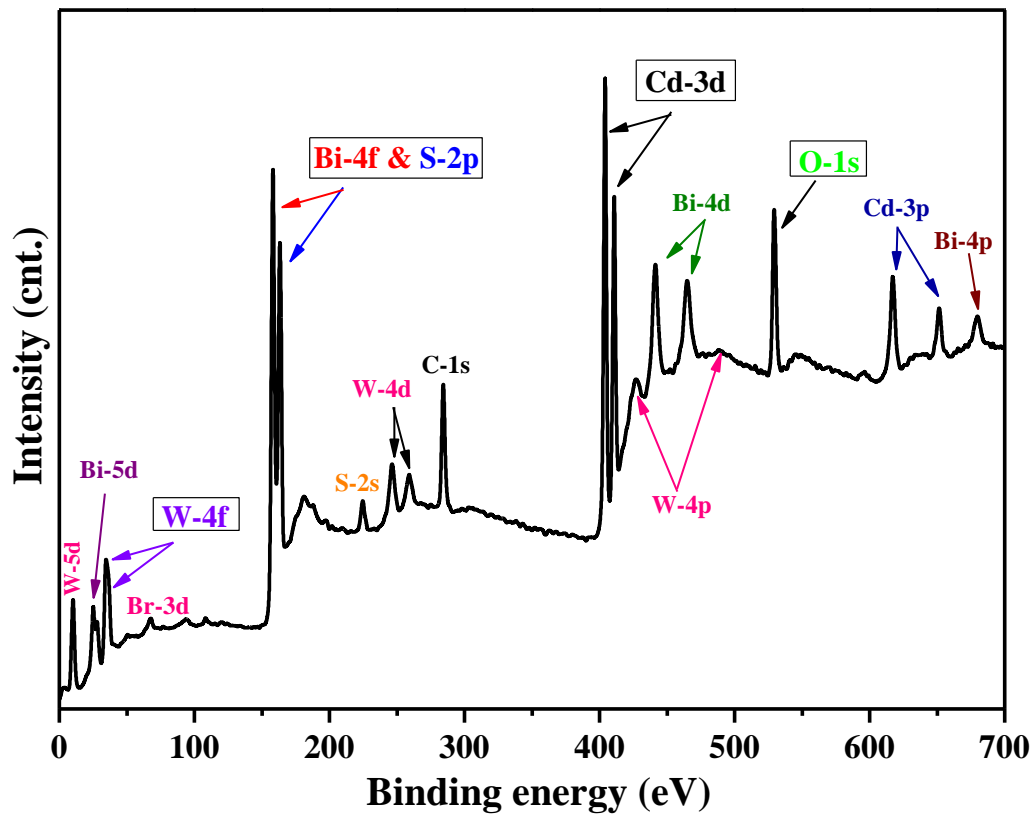

Fig. S1. XPS surface survey scan spectrum of CBWO-1 composite sample

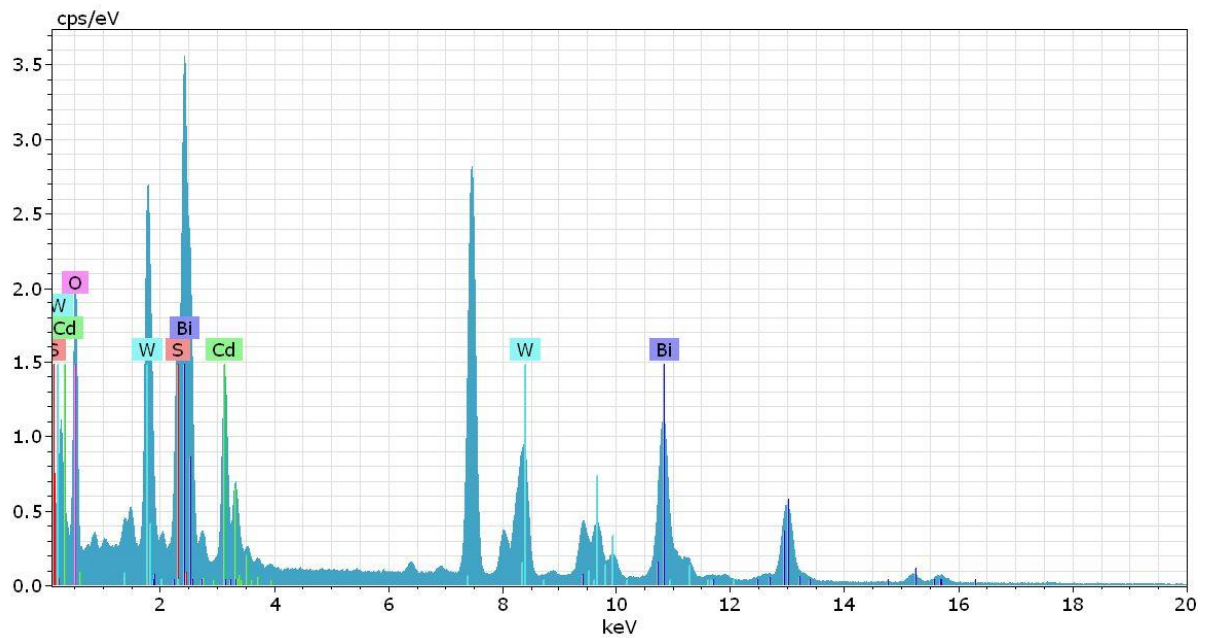

Fig. S2. STEM energy dispersive spectrum of CBWO-1 composite sample.

Table S1: STEM-EDX elemental analysis of CBWO-1 photocatalyst sample

| Element  | series   | [norm. wt.%] | [norm. at.%] |
|----------|----------|--------------|--------------|
| Sulfur   | K-series | 4.80093754   | 17.80715547  |
| Cadmium  | L-series | 15.15374041  | 16.03349358  |
| Bismuth  | L-series | 45.9622349   | 26.15826014  |
| Tungsten | L-series | 31.43795972  | 20.33780107  |
| Oxygen   | K-series | 2.645127426  | 19.66328975  |
|          |          | 100          | 100          |

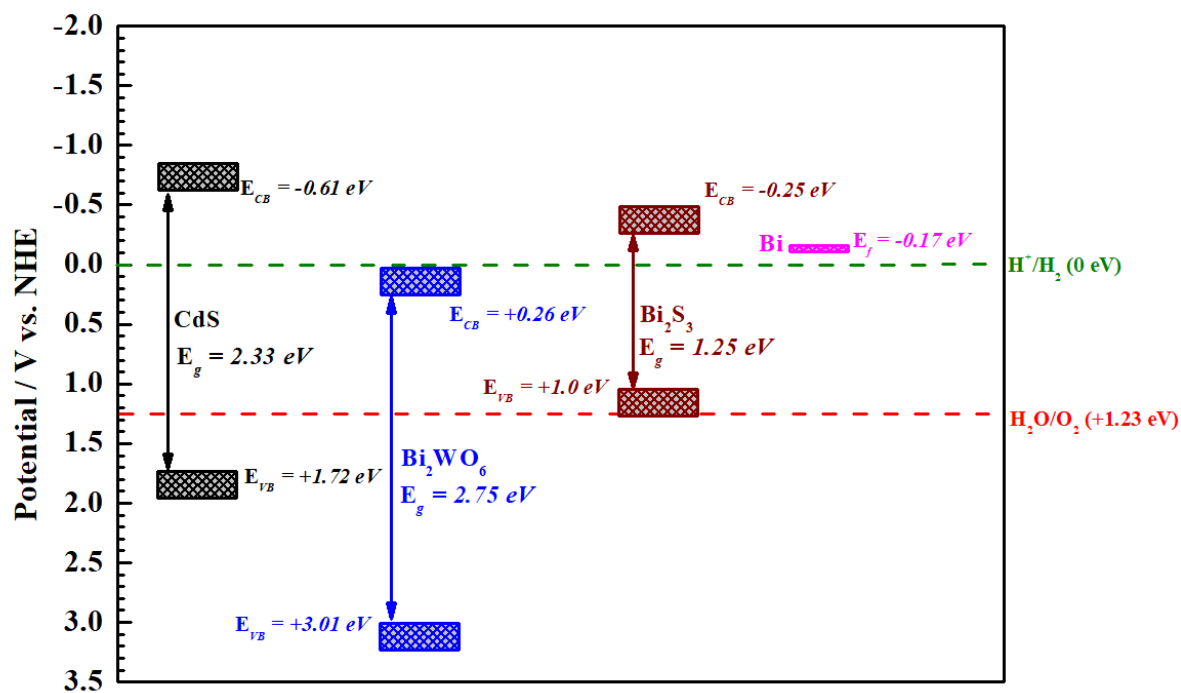

Fig. S3. The relative arrangement of band positions of the studied photocatalyst components.
